# Supplementary material
Source: PubMed Central journal article supplement (PMC3689986)

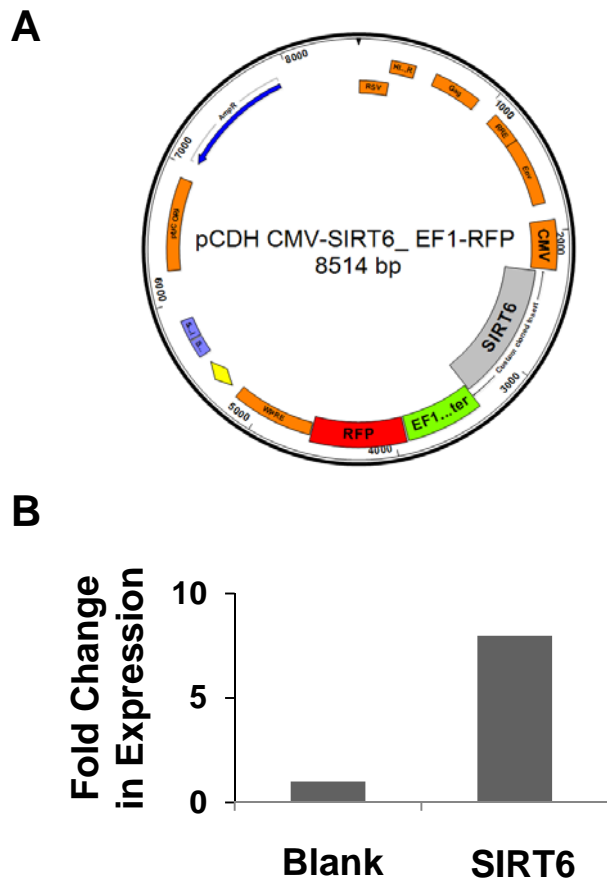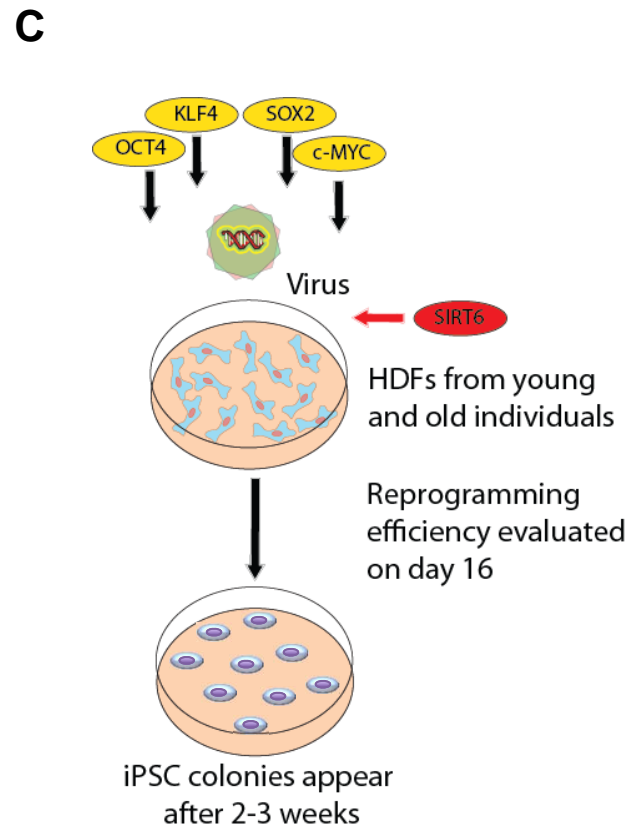

Supplementary Figure S1

iPSC lines without SIRT6

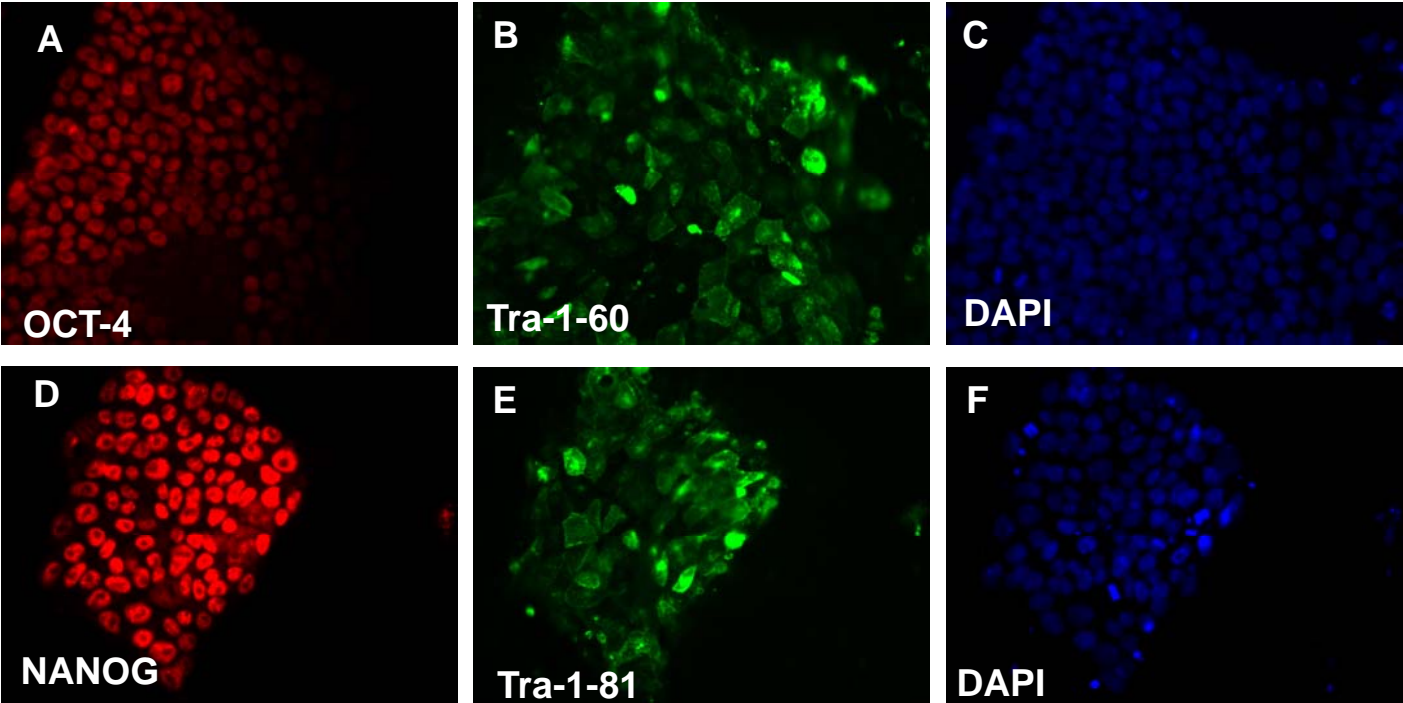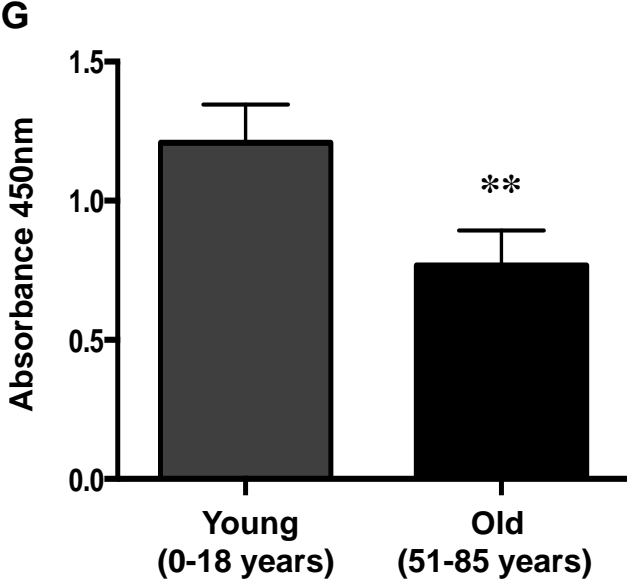

Supplementary Figure S2

## Alkaline Phosphatase Staining with and without SIRT6 expression

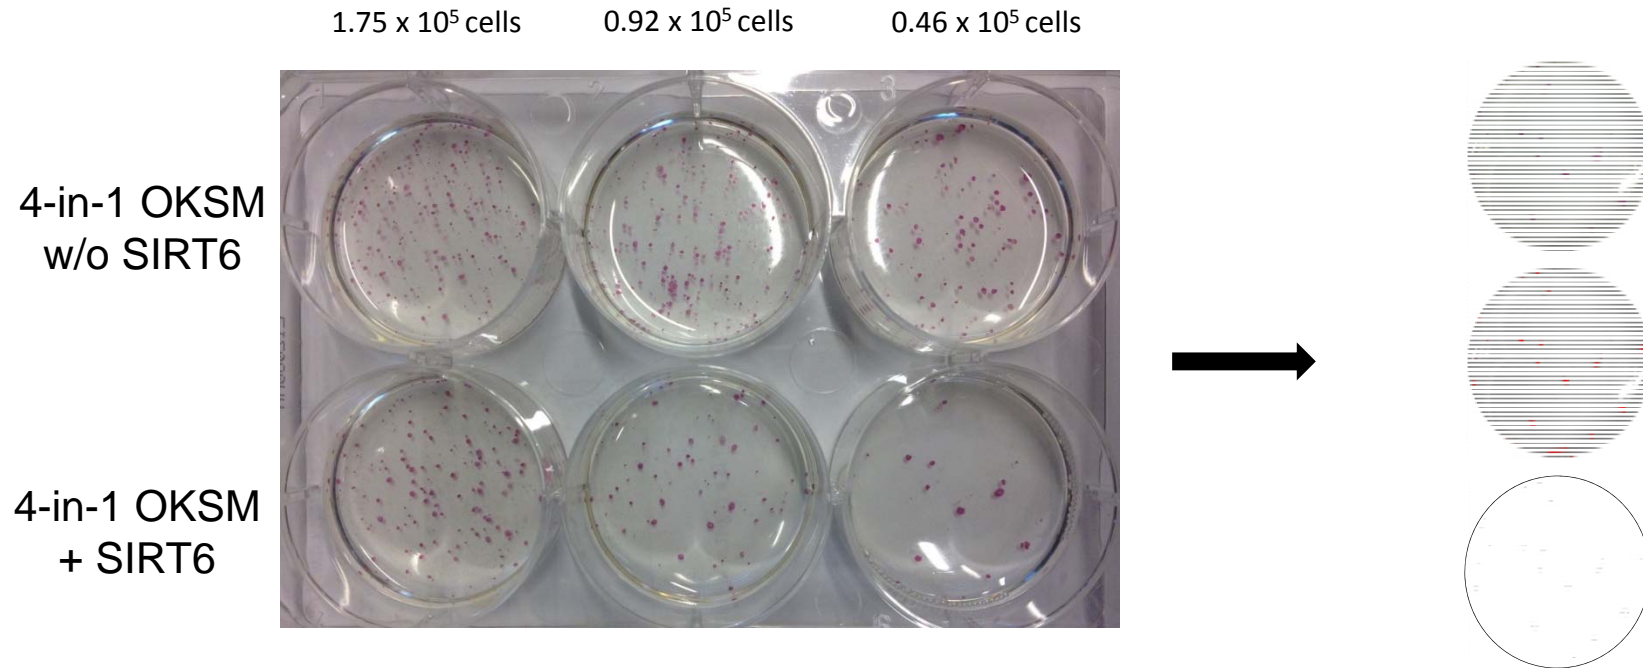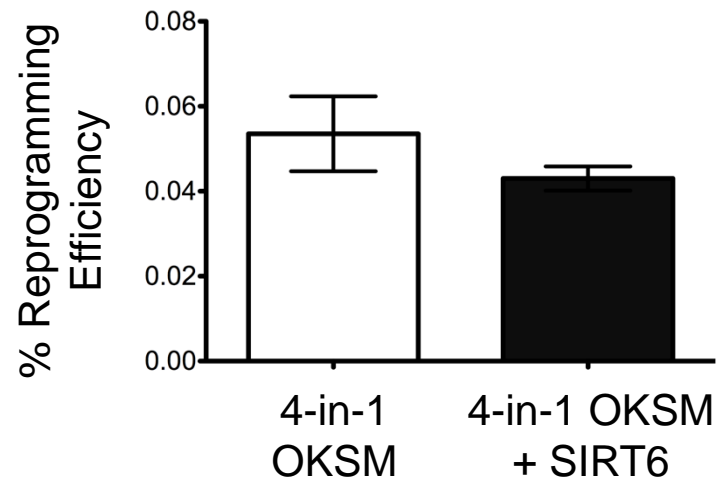

| Reprogramming factors | 1.75 x 10 <sup>5</sup> cells | 0.92 x 10 <sup>5</sup> cells | 0.46 x 10 <sup>5</sup> cells |
|-----------------------|------------------------------|------------------------------|------------------------------|
| 4-in-1 w/o SIRT6      | 112 colonies                 | 106 colonies                 | 63 colonies                  |
| 4-in-1 + SIRTt6       | 85 colonies                  | 36 colonies                  | 19 colonies                  |

**Supplementary Figure S3**

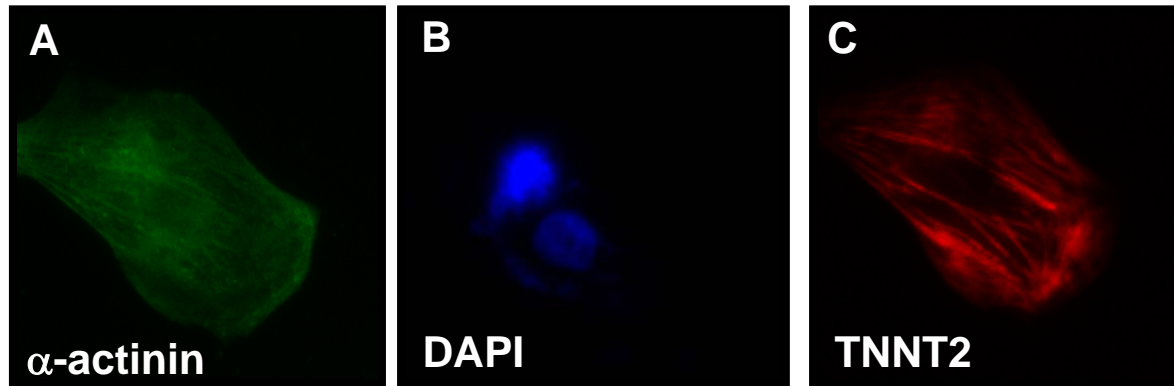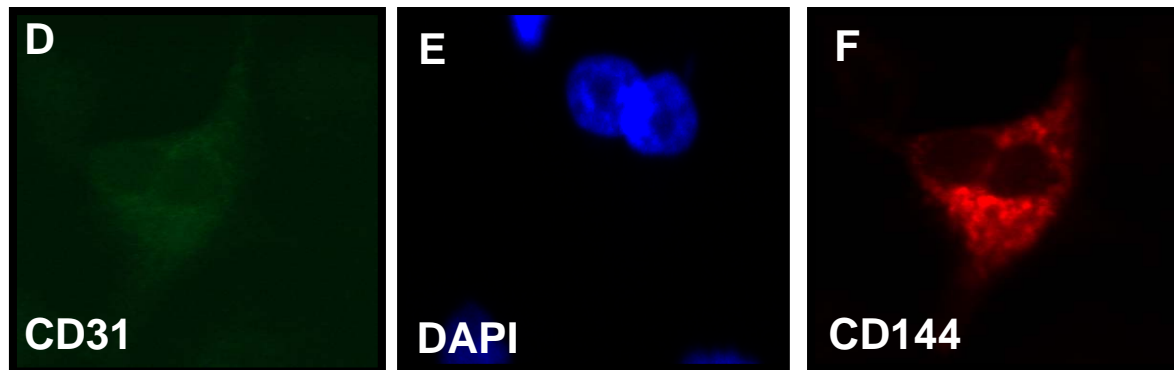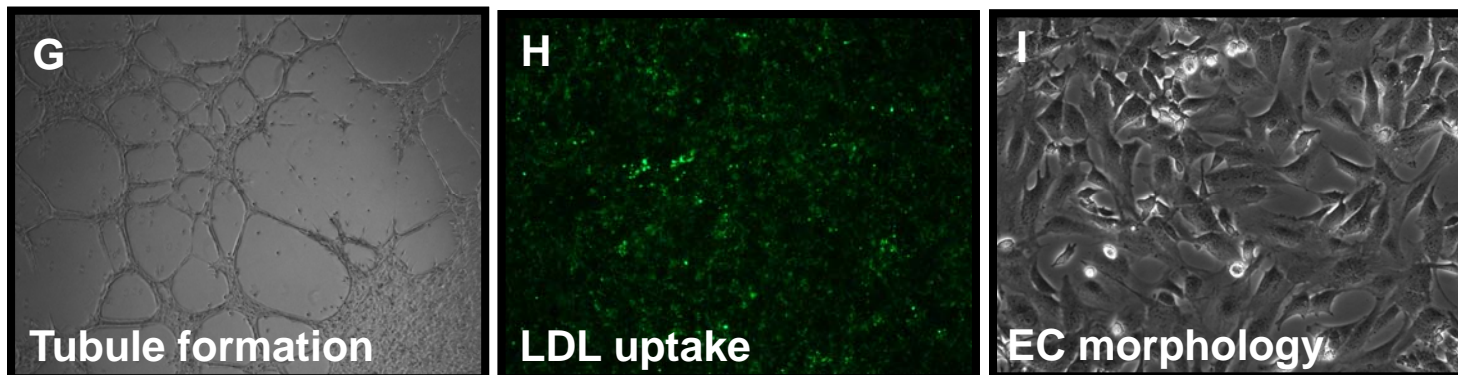

Supplementary Figure S4

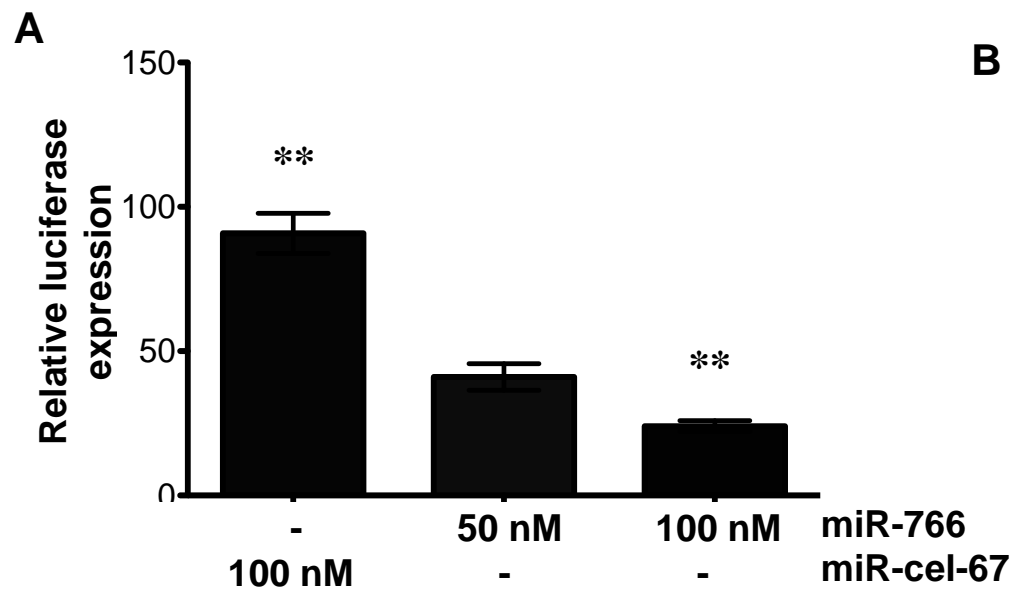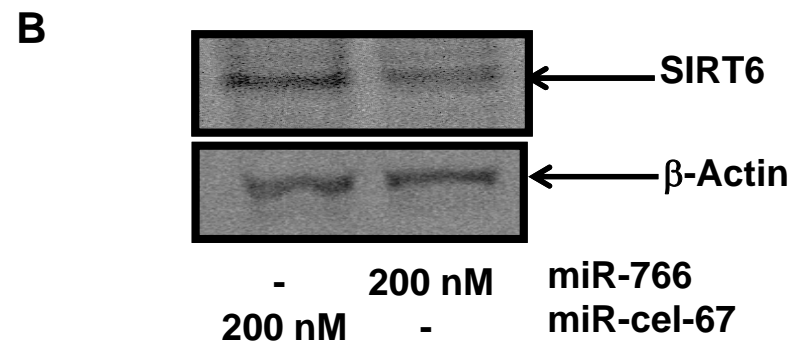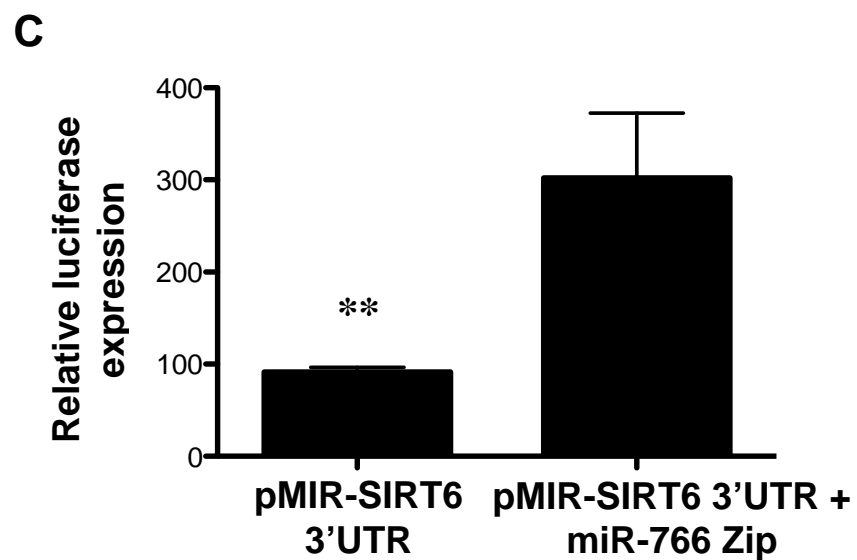

Supplementary Figure S5

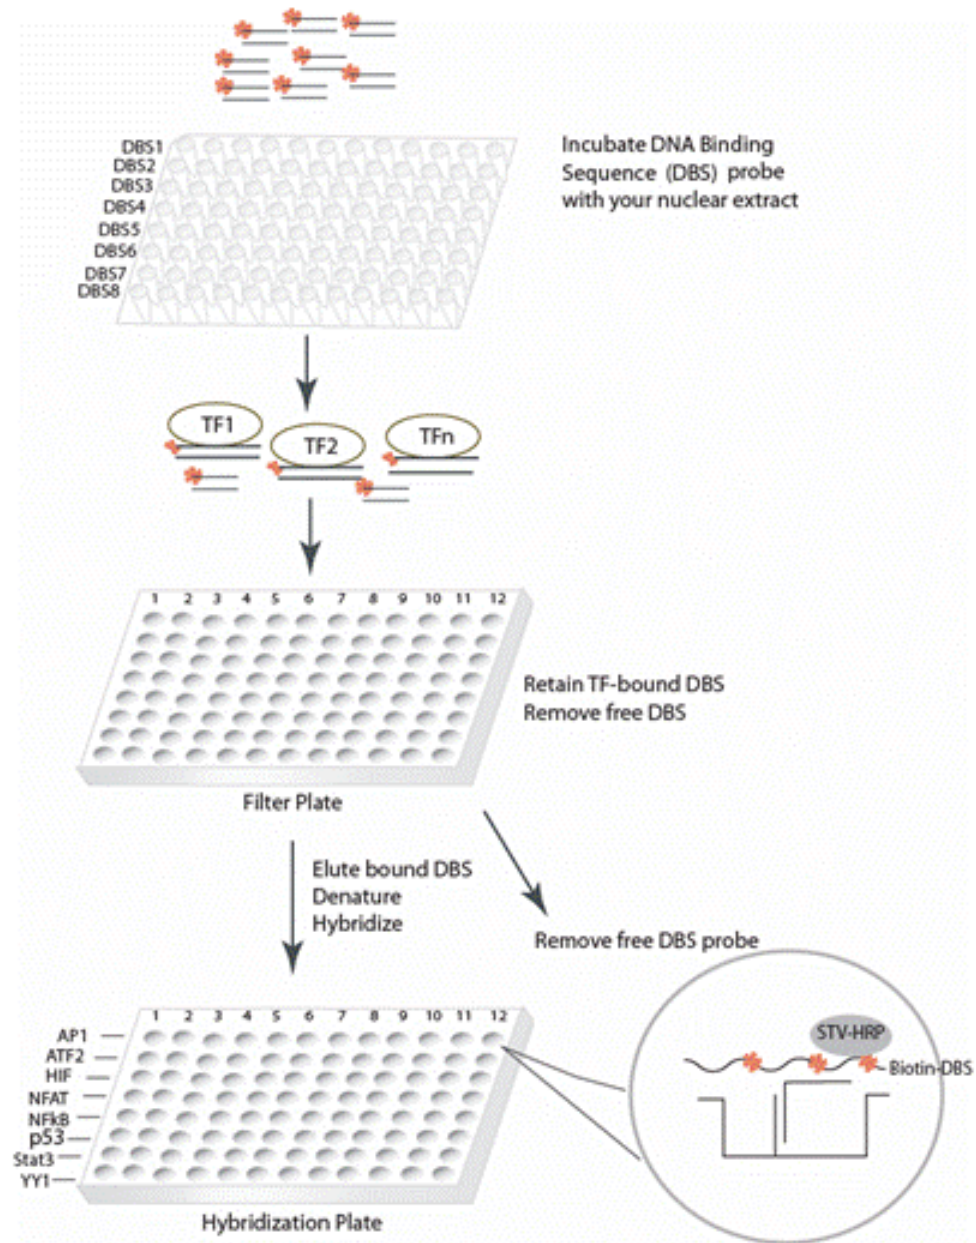

**Schematic representation of TF activation profiling assay**

**Supplementary Figure S6**

**A****TF binding assay on SEPT6 promoter**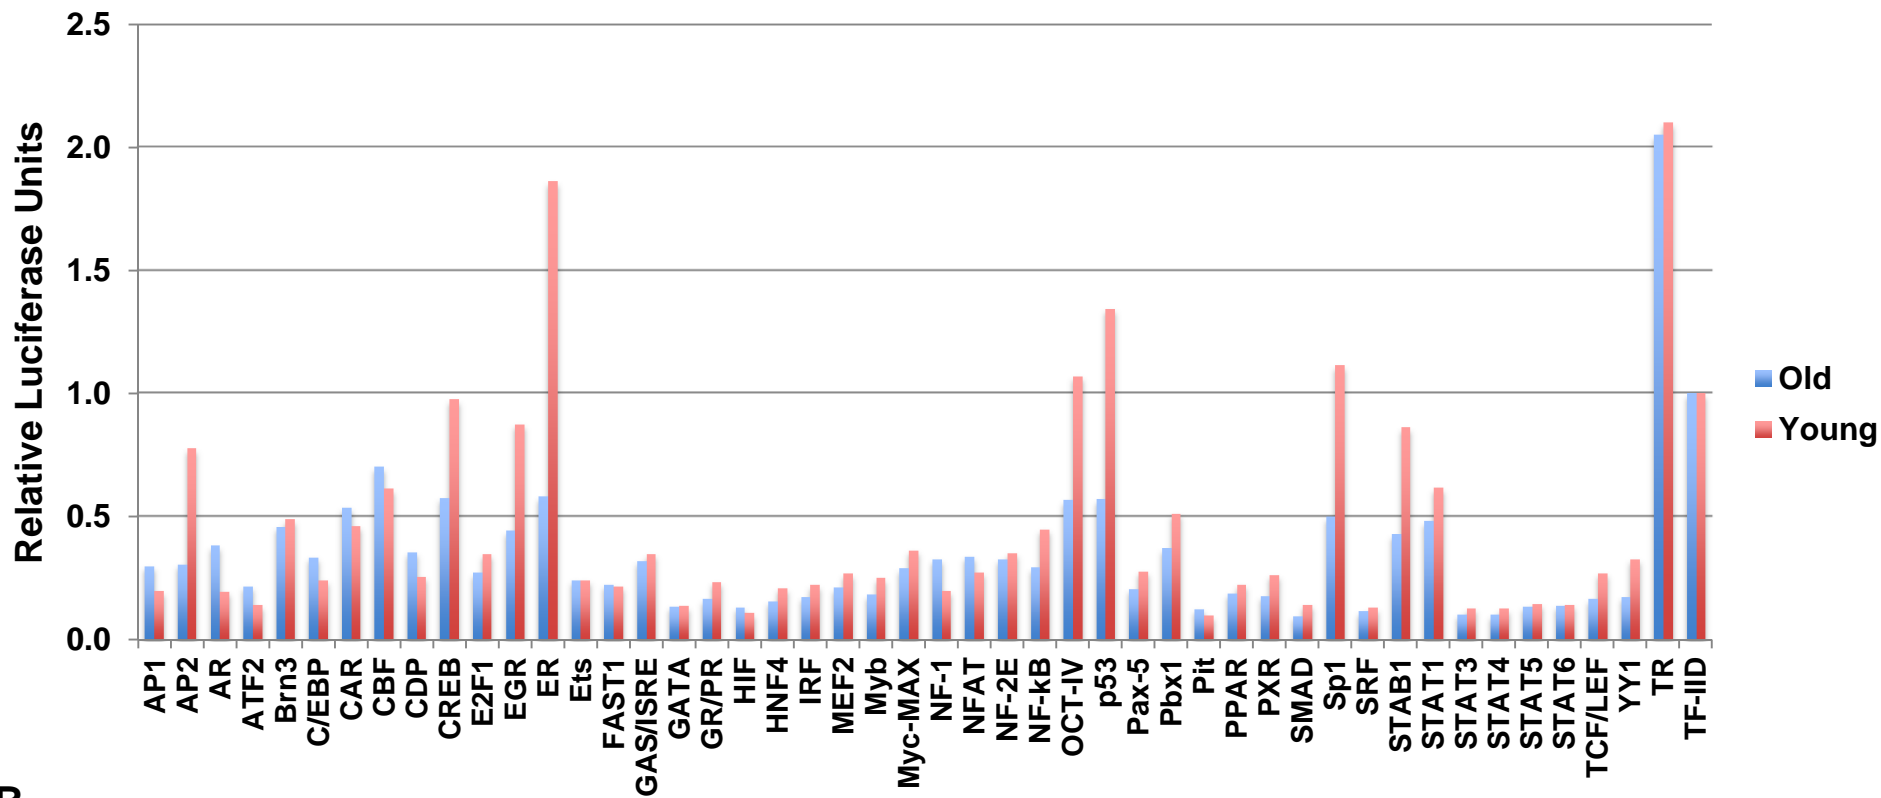**B**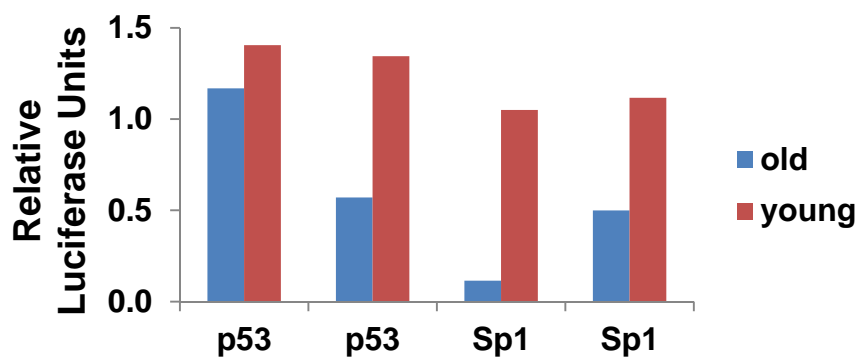

Supplement: supp_M112.405928_jbc.M112.405928-1.pdf [file supp_M112.405928_jbc.M112.405928-1.pdf]
